# Supplementary material
Source: ML conference proceedings conference paper supplement (https://openaccess.thecvf.com/content/ICCV_2019/html/Doan_Scalable_Place_Recognition_ICCV_2019_paper.html)
Supplement: Supplementary file 1 [file Doan_Scalable_Place_Recognition_ICCV_2019_supplemental.pdf]

# Scalable Place Recognition Under Appearance Change for Autonomous Driving Supplementary Material

Anh-Dzung Doan<sup>1</sup>, Yasir Latif<sup>1</sup>, Tat-Jun Chin<sup>1</sup>, Yu Liu<sup>1</sup>, Thanh-Toan Do<sup>2</sup>, and Ian Reid<sup>1</sup>

<sup>1</sup>School of Computer Science, The University of Adelaide

<sup>2</sup>Department of Computer Science, University of Liverpool

## Abstract

*In this supplementary material, we provide the statistics information of video sequences from Oxford RobotCar dataset, which we use in our experiment. Also, we show several sample images from Mapillary dataset.*

## 1. Statistics of Oxford RobotCar dataset

The statistics information of 8 sequences we use in Oxford RobotCar [1] is shown in Table 1.

## 2. Sample images of Mapillary

Sample images from our Mapillary dataset are shown in Figure 1

## References

- [1] Will Maddern, Geoffrey Pascoe, Chris Linegar, and Paul Newman. 1 year, 1000 km: The oxford robotcar dataset. *The International Journal of Robotics Research*, 2017.

| Abbreviation | Recorded             | Condition | Sequence length |
|--------------|----------------------|-----------|-----------------|
| Seq-1        | 26/06/2014, 09:24:58 | overcast  | 3164            |
| Seq-2        | 26/06/2014, 08:53:56 | overcast  | 3040            |
| Seq-3        | 23/06/2014, 15:41:25 | sun       | 3356            |
| Seq-4        | 23/06/2014, 15:36:04 | sun       | 3438            |
| Seq-5        | 23/06/2014, 15:14:44 | sun       | 3690            |
| Seq-6        | 24/06/2014, 14:15:17 | sun       | 3065            |
| Seq-7        | 24/06/2014, 14:09:07 | sun       | 3285            |
| Seq-8        | 24/06/2014, 14:20:41 | sun       | 3678            |

Table 1. Used sequences from the Oxford RobotCar dataset.

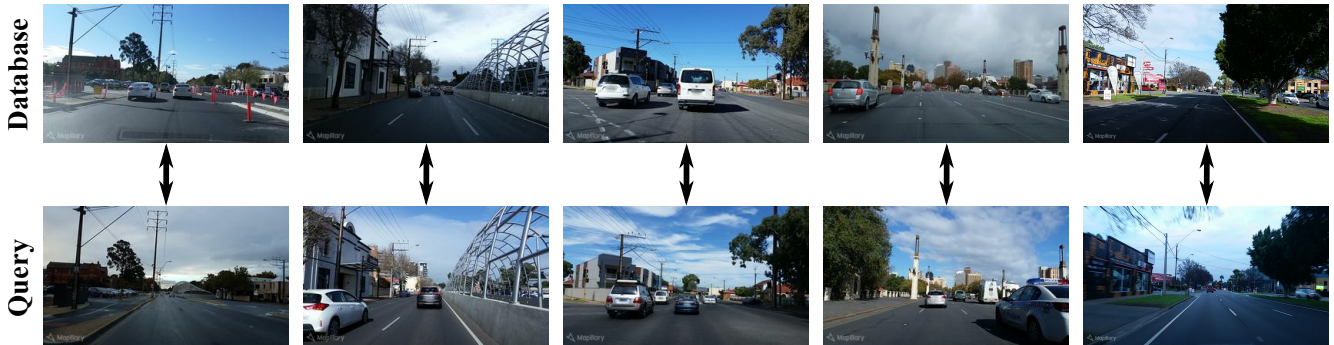

Figure 1. Sample images from our Mapillary dataset. The database image and its corresponding query have different appearance due to changes of environmental conditions and traffic density.
